# Supplementary material
Source: publisher figshare collection journal article supplement (https://frontiersin.figshare.com/ndownloader/files/25499099)
Supplement: Supplementary file [file 25499099]

# Personality Traits and Further Training

Marie-Christine Laible, Silke Anger, Martina Baumann

## Supplementary Materials: Appendix

**Table A1: Big Five Personality Dimensions and Participation in Overall Further Training**

Panel A: Pooled OLS (top) and Random Effects OLS (bottom)

|                     | Pooled OLS   |          |                       |              |          |                        |
|---------------------|--------------|----------|-----------------------|--------------|----------|------------------------|
|                     | Model 1      |          |                       | Model 2      |          |                        |
|                     | Average ME   | p-value  | 95%CI                 | Average ME   | p-value  | 95%CI                  |
| Extraversion        | 0.0123***    | (< .001) | [0.00572,0.0190]      | 0.0139***    | (< .001) | [0.00757,0.0203]       |
| Agreeableness       | 0.00236      | (.476)   | [-0.00413,0.00886]    | 0.00488      | (.126)   | [-0.00137,0.0111]      |
| Conscientiousness   | -0.0133***   | (< .001) | [-0.0197,-0.00687]    | -0.00380     | (.227)   | [-0.00995,0.00236]     |
| Neuroticism         | -0.0102**    | (.003)   | [-0.0169,-0.00348]    | -0.00349     | (.287)   | [-0.00992,0.00294]     |
| Openness            | 0.0696***    | (< .001) | [0.0632,0.0759]       | 0.0540***    | (< .001) | [0.0479,0.0602]        |
| Age                 | 0.0217***    | (< .001) | [0.0165,0.0270]       | 0.00871**    | (.001)   | [0.00348,0.0139]       |
| Age <sup>2</sup>    | -0.000277*** | (< .001) | [-0.000334,-0.000220] | -0.000123*** | (< .001) | [-0.000180,-0.0000666] |
| Gender              | -0.0509***   | (< .001) | [-0.0639,-0.0379]     | -0.0433***   | (< .001) | [-0.0558,-0.0308]      |
| Additional controls | no           |          |                       | yes          |          |                        |
| N                   | 17,242       |          |                       | 17,242       |          |                        |

  

| Random Effects OLS  |              |          |                       |              |          |                        |
|---------------------|--------------|----------|-----------------------|--------------|----------|------------------------|
| Extraversion        | 0.0120***    | (.001)   | [0.00507,0.0190]      | 0.0137***    | (< .001) | [0.00708,0.0204]       |
| Agreeableness       | 0.00357      | (.302)   | [-0.00321,0.0104]     | 0.00552      | (.098)   | [-0.00102,0.0121]      |
| Conscientiousness   | -0.00989**   | (.004)   | [-0.0165,-0.00325]    | -0.00212     | (.515)   | [-0.00850,0.00426]     |
| Neuroticism         | -0.00941**   | (.008)   | [-0.0163,-0.00249]    | -0.00382     | (.260)   | [-0.0105,0.00283]      |
| Openness            | 0.0622***    | (< .001) | [0.0554,0.0690]       | 0.0492***    | (< .001) | [0.0427,0.0557]        |
| Age                 | 0.0209***    | (< .001) | [0.0153,0.0266]       | 0.00913**    | (0.001)  | [0.00356,0.0147]       |
| Age <sup>2</sup>    | -0.000269*** | (< .001) | [-0.000330,-0.000208] | -0.000127*** | (< .001) | [-0.000187,-0.0000668] |
| Gender              | -0.0511***   | (< .001) | [-0.0656,-0.0366]     | -0.0438***   | (< .001) | [-0.0576,-0.0301]      |
| Additional controls | no           |          |                       | yes          |          |                        |
| N                   | 17,242       |          |                       | 17,242       |          |                        |

**Panel B: Pooled Probit (top) and Random Effects Probit (bottom)**

|                     | <b>Pooled Probit</b> |          |                       |                |          |                        |
|---------------------|----------------------|----------|-----------------------|----------------|----------|------------------------|
|                     | <b>Model 1</b>       |          |                       | <b>Model 2</b> |          |                        |
|                     | Average ME           | p-value  | 95%CI                 | Average ME     | p-value  | 95%CI                  |
| Extraversion        | 0.0123***            | (.001)   | [0.00535,0.0192]      | 0.0132***      | (< .001) | [0.00675,0.0197]       |
| Agreeableness       | 0.00323              | (.352)   | [-0.00358,0.0100]     | 0.00539        | (.096)   | [-0.000966,0.0117]     |
| Conscientiousness   | -0.0134***           | (< .001) | [-0.0202,-0.00650]    | -0.00361       | (.268)   | [-0.00999,0.00277]     |
| Neuroticism         | -0.0100**            | (.005)   | [-0.0170,-0.00309]    | -0.00312       | (.343)   | [-0.00955,0.00332]     |
| Openness            | 0.0682***            | (< .001) | [0.0616,0.0747]       | 0.0518***      | (< .001) | [0.0456,0.0580]        |
| Age                 | 0.0199***            | (< .001) | [0.0143,0.0254]       | 0.00801**      | (.005)   | [0.00247,0.0136]       |
| Age <sup>2</sup>    | -0.000255***         | (< .001) | [-0.000314,-0.000195] | -0.000112***   | (< .001) | [-0.000171,-0.0000532] |
| Gender              | -0.0499***           | (< .001) | [-0.0643,-0.0355]     | -0.0420***     | (< .001) | [-0.0556,-0.0285]      |
| Additional controls | no                   |          |                       | yes            |          |                        |
| N                   | 17,242               |          |                       | 17,242         |          |                        |

  

| <b>Random Effects Probit</b> |              |          |                       |              |          |                        |
|------------------------------|--------------|----------|-----------------------|--------------|----------|------------------------|
| Extraversion                 | 0.0122***    | (< .001) | [0.00540,0.0190]      | 0.0131***    | (< .001) | [0.00674,0.0195]       |
| Agreeableness                | 0.00431      | (.202)   | [-0.00231,0.0109]     | 0.00599      | (.059)   | [-0.000225,0.0122]     |
| Conscientiousness            | -0.0106**    | (.002)   | [-0.0173,-0.00391]    | -0.00246     | (.442)   | [-0.00874,0.00381]     |
| Neuroticism                  | -0.00925**   | (.007)   | [-0.0160,-0.00254]    | -0.00339     | (.289)   | [-0.00966,0.00288]     |
| Openness                     | 0.0616***    | (< .001) | [0.0551,0.0681]       | 0.0476***    |          | [0.0414,0.0538]        |
| Age                          | 0.0197***    | (< .001) | [0.0141,0.0252]       | 0.00857**    | (.002)   | [0.00308,0.0141]       |
| Age <sup>2</sup>             | -0.000252*** | (< .001) | [-0.000311,-0.000193] | -0.000117*** | (< .001) | [-0.000176,-0.0000592] |
| Gender                       | -0.0500***   | (< .001) | [-0.0644,-0.0356]     | -0.0419***   | (< .001) | [-0.0554,-0.0284]      |
| Additional controls          | no           |          |                       | yes          |          |                        |
| N                            | 17,242       |          |                       | 17,242       |          |                        |

Notes: Average marginal effects (ME) with p-values in parentheses and confidence interval (CI) in square brackets. \* p < .05, \*\* p < .01, \*\*\* p < .001. Panel A: Average marginal effects of pooled ordinary least squares (OLS) and random effects estimation. Robust standard errors clustered at the individual level (10,559 individuals). Panel B: Average marginal effects of pooled probit and random effects probit estimation. Robust standard errors clustered at the individual level (10,559 individuals). Model 1 in each panel contains the following control variables: Gender (female=1), age, and a wave indicator. Model 2 contains the following additional control variables: Children under six years in the household (yes=1), education (no degree, lower secondary degree, intermediate secondary degree, high school degree), household income, unemployment (yes=1).

Source: Own calculations based on NEPS SUF SC6 9.0.1.

**Table A2: Big Five Personality Dimensions and Non-Formal and Informal Further Training Participation**

**Panel A: Participation in Non-Formal Training**

|                     | Pooled Probit |          |                       |              |          |                       |
|---------------------|---------------|----------|-----------------------|--------------|----------|-----------------------|
|                     | Model 1       |          |                       | Model 2      |          |                       |
|                     | Average ME    | p-value  | 95%CI                 | Average ME   | p-value  | 95%CI                 |
| Extraversion        | 0.0141***     | (< .001) | [0.00621,0.0221]      | 0.0143***    | (0.000)  | [0.00652,0.0222]      |
| Agreeableness       | 0.0109**      | (0.005)  | [0.00327,0.0186]      | 0.0132***    | (0.001)  | [0.00559,0.0208]      |
| Conscientiousness   | -0.0123**     | (0.002)  | [-0.0201,-0.00445]    | -0.00710     | (0.073)  | [-0.0148,0.000653]    |
| Neuroticism         | -0.0103*      | (0.010)  | [-0.0181,-0.00243]    | -0.00547     | (0.167)  | [-0.0132,0.00229]     |
| Openness            | 0.0402***     | (< .001) | [0.0324,0.0480]       | 0.0320***    | (0.000)  | [0.0243,0.0398]       |
| Age                 | 0.0318***     | (< .001) | [0.0253,0.0383]       | 0.0205***    | (< .001) | [0.0139,0.0271]       |
| Age <sup>2</sup>    | -0.000380***  | (< .001) | [-0.000449,-0.000310] | -0.000250*** | (< .001) | [-0.000321,-0.000179] |
| Gender              | 0.0449***     | (< .001) | [0.0285,0.0614]       | 0.0521***    | (< .001) | [0.0359,0.0683]       |
| Additional controls | no            |          |                       | yes          |          |                       |
| N                   | 17,242        |          |                       | 17,242       |          |                       |

  

| Random Effects Probit |              |          |                       |              |          |                       |
|-----------------------|--------------|----------|-----------------------|--------------|----------|-----------------------|
| Extraversion          | 0.0135***    | (.001)   | [0.00565,0.0213]      | 0.0139***    | (< .001) | [0.00620,0.0217]      |
| Agreeableness         | 0.0105**     | (.006)   | [0.00297,0.0181]      | 0.0127***    | (.001)   | [0.00525,0.0202]      |
| Conscientiousness     | -0.0112**    | (.004)   | [-0.0189,-0.00350]    | -0.00650     | (.096)   | [-0.0142,0.00116]     |
| Neuroticism           | -0.0110**    | (.005)   | [-0.0187,-0.00329]    | -0.00651     | (.096)   | [-0.0142,0.00116]     |
| Openness              | 0.0393***    | (< .001) | [0.0316,0.0469]       | 0.0314***    | (< .001) | [0.0237,0.0391]       |
| Age                   | 0.0322***    | (< .001) | [0.0258,0.0386]       | 0.0212***    | (< .001) | [0.0146,0.0278]       |
| Age <sup>2</sup>      | -0.000385*** | (< .001) | [-0.000453,-0.000316] | -0.000259*** | (< .001) | [-0.000329,-0.000188] |
| Gender                | 0.0449***    | (< .001) | [0.0286,0.0613]       | 0.0518***    | (< .001) | [0.0357,0.0679]       |
| Additional controls   | no           |          |                       | yes          |          |                       |
| N                     | 17,242       |          |                       | 17,242       |          |                       |

## Panel B: Participation in Informal Training

|                     | Pooled Probit |         |                       |            |         |                       |
|---------------------|---------------|---------|-----------------------|------------|---------|-----------------------|
|                     | Model 1       |         |                       | Model 2    |         |                       |
|                     | Average ME    | p-value | 95%CI                 | Average ME | p-value | 95%CI                 |
| Extraversion        | 0.0101*       | (.011)  | [0.00236,0.0179]      | 0.0125***  | (.001)  | [0.00524,0.0199]      |
| Agreeableness       | 0.00276       | (.475)  | [-0.00482,0.0103]     | 0.00505    | (.162)  | [-0.00203,0.0121]     |
| Conscientiousness   | -0.0110**     | (.005)  | [-0.0186,-0.00338]    | 0.00114    | (.753)  | [-0.00598,0.00826]    |
| Neuroticism         | -0.0100*      | (.011)  | [-0.0178,-0.00231]    | -0.00250   | (.496)  | [-0.00970,0.00470]    |
| Openness            | 0.0793***     | (<.001) | [0.0721,0.0866]       | 0.0596***  | (<.001) | [0.0526,0.0666]       |
| Age                 | 0.0145***     | (<.001) | [0.00808,0.0208]      | 0.00323    | (.313)  | [-0.00304,0.00951]    |
| Age <sup>2</sup>    | -0.000190***  | (<.001) | [-0.000258,-0.000122] | -0.0000509 | (.135)  | [-0.000118,0.0000158] |
| Gender              | -0.0742***    | (<.001) | [-0.0904,-0.0581]     | -0.0664*** | (<.001) | [-0.0816,-0.0512]     |
| Additional controls | no            |         |                       | yes        |         |                       |
| N                   | 17,242        | 17,242  |                       |            |         |                       |

  

| Random Effects Probit |              |         |                       |            |         |                       |
|-----------------------|--------------|---------|-----------------------|------------|---------|-----------------------|
| Extraversion          | 0.0108**     | (.005)  | [0.00323,0.0183]      | 0.0128***  | (<.001) | [0.00572,0.0200]      |
| Agreeableness         | 0.00439      | (.240)  | [-0.00293,0.0117]     | 0.00610    | (.083)  | [-0.000796,0.0130]    |
| Conscientiousness     | -0.00831*    | (.026)  | [-0.0157,-0.000973]   | 0.00178    | (.614)  | [-0.00515,0.00872]    |
| Neuroticism           | -0.00788*    | (.036)  | [-0.0153,-0.000495]   | -0.00196   | (.580)  | [-0.00892,0.00500]    |
| Openness              | 0.0686***    | (<.001) | [0.0614,0.0759]       | 0.0526***  | (<.001) | [0.0456,0.0595]       |
| Age                   | 0.0137***    | (<.001) | [0.00737,0.0199]      | 0.00344    | (0.275) | [-0.00274,0.00962]    |
| Age <sup>2</sup>      | -0.000182*** | (<.001) | [-0.000249,-0.000115] | -0.0000526 | (0.116) | [-0.000118,0.0000130] |
| Gender                | -0.0750***   | (<.001) | [-0.0911,-0.0589]     | -0.0668*** | (<.001) | [-0.0819,-0.0517]     |
| Additional controls   | no           |         |                       | yes        |         |                       |
| N                     | 17,242       |         |                       | 17,242     |         |                       |

Notes: Average marginal effects (ME) with p-values in parentheses and confidence interval (CI) in square brackets. \* p < .05, \*\* p < .01, \*\*\* p < .001. Panel A: Average marginal effects of pooled probit and random effects probit estimation. Robust standard errors clustered at the individual level (10,559 individuals). Model 1 in each panel contains the following control variables: Gender (female=1), age, and a wave indicator. Model 2 contains the following additional control variables: Children under six years in the household (yes=1), education (no degree, lower secondary degree, intermediate secondary degree, high school degree), household income, unemployment (yes=1).

Source: Own calculations based on NEPS SUF SC6 9.0.1.

**Table A3: Big Five Personality Dimensions and Participation in Non-Formal Training by Gender**

|                     | Male         |          |                       |              |          |                       |
|---------------------|--------------|----------|-----------------------|--------------|----------|-----------------------|
|                     | Model 1      |          |                       | Model 2      |          |                       |
|                     | Average ME   | p-value  | 95%CI                 | Average ME   | p-value  | 95%CI                 |
| Extraversion        | 0.0147**     | (.010)   | [0.00358,0.0258]      | 0.0145**     | (.010)   | [0.00351,0.0255]      |
| Agreeableness       | 0.0104       | (.053)   | [-0.000129,0.0210]    | 0.00968      | (.069)   | [-0.000772,0.0201]    |
| Conscientiousness   | -0.000571    | (.917)   | [-0.0113,0.0102]      | -0.000336    | (.951)   | [-0.0110,0.0103]      |
| Neuroticism         | 0.00271      | (.634)   | [-0.00842,0.0138]     | 0.00180      | (.749)   | [-0.00923,0.0128]     |
| Openness            | 0.0178**     | (.002)   | [0.00663,0.0290]      | 0.0181**     | (.001)   | [0.00702,0.0291]      |
| Age                 | 0.0215***    | (< .001) | [0.0124,0.0306]       | 0.0224***    | (< .001) | [0.0134,0.0314]       |
| Age <sup>2</sup>    | -0.000278*** | (< .001) | [-0.000375,-0.000181] | -0.000287*** | (< .001) | [-0.000384,-0.000191] |
| Additional controls | yes          |          |                       | yes          |          |                       |
| N                   | 8,532        |          |                       | 8,532        |          |                       |

  

| Female              |              |          |                       |              |          |                       |
|---------------------|--------------|----------|-----------------------|--------------|----------|-----------------------|
| Extraversion        | 0.0136*      | (.015)   | [0.00260,0.0246]      | 0.0130*      | (.019)   | [0.00214,0.0239]      |
| Agreeableness       | 0.0168**     | (.003)   | [0.00586,0.0276]      | 0.0167**     | (.002)   | [0.00600,0.0275]      |
| Conscientiousness   | -0.0131*     | (.021)   | [-0.0243,-0.00202]    | -0.0121*     | (.030)   | [-0.0231,-0.00117]    |
| Neuroticism         | -0.0124*     | (.024)   | [-0.0232,-0.00161]    | -0.0137*     | (.012)   | [-0.0243,-0.00304]    |
| Openness            | 0.0445***    | (< .001) | [0.0338,0.0553]       | 0.0430***    | (< .001) | [0.0324,0.0536]       |
| Age                 | 0.0181***    | (< .001) | [0.00841,0.0278]      | 0.0190***    | (< .001) | [0.00935,0.0287]      |
| Age <sup>2</sup>    | -0.000207*** | (< .001) | [-0.000310,-0.000103] | -0.000217*** | (< .001) | [-0.000320,-0.000114] |
| Additional controls | yes          |          |                       | yes          |          |                       |
| N                   | 8,710        |          |                       | 8,710        |          |                       |

Notes: Average marginal effects (ME) with p-values in parentheses and confidence interval (CI) in square brackets. \* p < .05, \*\* p < .01, \*\*\* p < .001. Robust standard errors clustered at the individual level: 5,234 males and 5,325 females. All models contain the following additional control variables: Children under six years in the household (yes=1), education (no degree, lower secondary degree, intermediate secondary degree, high school degree), household income, unemployment (yes=1) and a wave indicator. The dependent variable is non-formal further training participation (=1). A suest-test confirms that the genders significantly differ from each other.

Source: Own calculations based on NEPS SUF SC6 9.0.1.

**Table A4 Big Five Personality Dimensions and Privately Motivated Non-Formal Further Training Participation**

|                     | Pooled Probit |         |                     |             |         |                     |
|---------------------|---------------|---------|---------------------|-------------|---------|---------------------|
|                     | Model 1       |         |                     | Model 2     |         |                     |
|                     | Average ME    | p-value | 95%CI               | Average ME  | p-value | 95%CI               |
| Extraversion        | 0.0117        | (.056)  | [-0.000295,0.0238]  | 0.0115      | (.061)  | [-0.000530,0.0236]  |
| Agreeableness       | -0.00289      | (.630)  | [-0.0147,0.00888]   | -0.00298    | (.620)  | [-0.0148,0.00881]   |
| Conscientiousness   | -0.0199***    | (.001)  | [-0.0316,-0.00823]  | -0.0209***  | (<.001) | [-0.0326,-0.00919]  |
| Neuroticism         | 0.0135*       | (.036)  | [0.000884,0.0261]   | 0.0129*     | (.045)  | [0.000271,0.0256]   |
| Openness            | 0.0212***     | (<.001) | [0.00937,0.0330]    | 0.0210***   | (.001)  | [0.00905,0.0329]    |
| Age                 | -0.0351***    | (<.001) | [-0.0451,-0.0252]   | -0.0326***  | (<.001) | [-0.0429,-0.0224]   |
| Age <sup>2</sup>    | 0.000402***   | (<.001) | [0.000293,0.000511] | 0.000377*** | (<.001) | [0.000265,0.000488] |
| Gender              | 0.0755***     | (<.001) | [0.0516,0.0994]     | 0.0755***   | (<.001) | [0.0514,0.0997]     |
| Additional controls | no            |         |                     | yes         |         |                     |
| N                   | 6,364         |         |                     | 6,364       |         |                     |

  

| Random Effects Probit |             |         |                     |             |         |                     |
|-----------------------|-------------|---------|---------------------|-------------|---------|---------------------|
| Extraversion          | 0.0109      | (.074)  | [-0.00107,0.0229]   | 0.0109      | (.076)  | [-0.00114,0.0229]   |
| Agreeableness         | -0.00152    | (.799)  | [-0.0132,0.0102]    | -0.00173    | (.772)  | [-0.0134,0.00998]   |
| Conscientiousness     | -0.0191**   | (.001)  | [-0.0307,-0.00756]  | -0.0200***  | (.001)  | [-0.0316,-0.00837]  |
| Neuroticism           | 0.0139*     | (.028)  | [0.00150,0.0264]    | 0.0134*     | (.034)  | [0.000984,0.0259]   |
| Openness              | 0.0202***   | (.001)  | [0.00845,0.0319]    | 0.0199***   | (.001)  | [0.00809,0.0318]    |
| Age                   | -0.0350***  | (<.001) | [-0.0449,-0.0251]   | -0.0325***  | (<.001) | [-0.0427,-0.0223]   |
| Age <sup>2</sup>      | 0.000402*** | (<.001) | [0.000293,0.000510] | 0.000376*** | (<.001) | [0.000265,0.000487] |
| Gender                | 0.0763***   | (<.001) | [0.0525,0.100]      | 0.0765***   | (<.001) | [0.0525,0.101]      |
| Additional controls   | no          |         |                     | yes         |         |                     |
| N                     | 6,364       |         |                     | 6,364       |         |                     |

Notes: Average marginal effects (ME) with p-values in parentheses and confidence interval (CI) in square brackets. \* p < .05, \*\* p < .01, \*\*\* p < .001. Robust standard errors clustered at the individual level (5,067 individuals). Model 1 contains the following control variables: Gender (female=1), age, and a wave indicator. Model 2 contains the following additional control variables Children under six years in the household (yes =1), education (no degree, lower secondary degree, intermediate secondary degree, high school degree), household income, unemployment (yes=1). Random sample of respondents with participation in non-formal further training, who were asked whether their non-formal further training was privately motivated (=1), occupationally motivated (=0) or both (=0).

Source: Own calculations based on NEPS SUF SC6 9.0.1

Figure 1: Extraversion and Further Training Participation Across Age

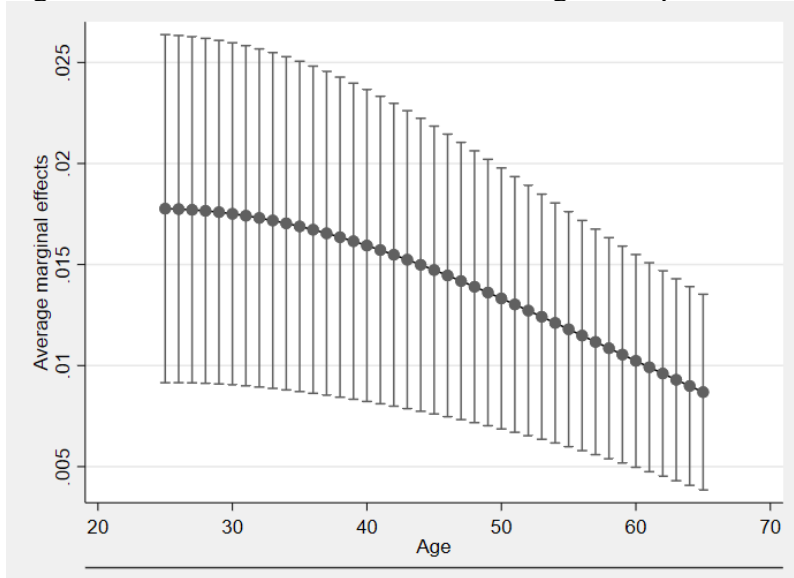

Notes: This figure shows the average marginal effects and the 95% confidence intervals of the impact of extraversion on further training participation across age for N=17,242 individuals.

Source: Own calculations based on NEPS SUF SC6 9.0.1.

Figure 2: Openness and Further Training Participation Across Age

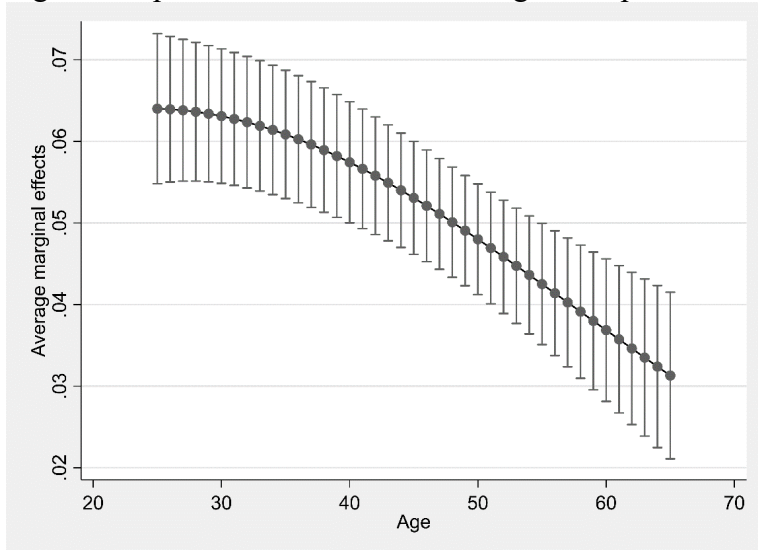

Notes: This figure shows the average marginal effects and the 95% confidence intervals of the impact of openness on further training participation across age for N=17,242 individuals.
